# Supplementary material for: The role of photorespiration during the evolution of C4 photosynthesis in the genus Flaveria
Source: eLife. 2014 Jun 16;3:e02478. doi: 10.7554/eLife.02478 (PMC4103682; doi:10.7554/eLife.02478)
Supplement: Figure 2—source data 1. — DOI: http://dx.doi.org/10.7554/eLife.02478.005 [file elife02478s001.xlsx]

## Sheet: Blatt1
probe:	total reads	filtered reads	mapped reads	% reads mapped on TAIR9 minimalized transcriptome	No. of Loci with hits in TAIR9 minimalized transcriptom
Fa1	47645158	36894589	20617007	55.88	15869
Fa2	43235798	34209869	18023691	52.69	15869
Fa3	47342816	36587859	19128982	52.28	15912
Fa4	51845372	35040440	18268382	52.14	15894
Fb1	55368986	46347507	22254996	48.02	16031
Fb2	49095950	37997167	19434444	51.15	16935
Fb3	55755875	42422162	20821551	49.08	16079
Fb4	75080214	50528025	26022616	51.5	16064
Fbr1	45603858	35446619	14166251	39.97	15757
Fbr2	58972619	47817579	24957626	52.19	16111
Fbr3	53371926	40310916	20831042	51.68	16074
Fbr4	44451825	30155694	15314405	50.78	15802
Fc1	54540666	42043878	23940601	56.94	15926
Fc2	58412299	44747359	21556854	48.17	15774
Fc3	83862797	58785391	30069079	51.15	16002
Fc4	54256788	37979614	19920545	52.45	15918
Fpr1	37296222	30642954	15582202	50.85	15829
Fpr2	56527749	42973812	23896059	55.61	16151
Fpr3	43405759	30790618	15549440	50.5	15992
Fpr4	54670179	38357173	20961354	54.65	16093
Fpu1	41930342	34232897	18874759	55.14	15916
Fpu2	39360671	32734641	18083610	55.24	15765
Fpu3	58333868	45201020	23911153	52.9	15936
Fpu4	64359102	43237749	22597999	52.26	16086
Fra1	52953651	39867354	21681584	54.38	15919
Fra2	51844819	39253984	22777208	58.03	15986
Fra3	61878200	47226593	26435965	55.98	16022
Fra4	57590482	38158586	20905243	54.79	15943
Fro1	51323648	41350398	19693748	47.63	15893
Fro2	50030400	37026555	19320966	52.18	15951
Fro3	49569220	35554741	18514705	52.07	15975
Fro4	62212599	44064923	23443447	53.2	16183
Ft1	64130167	51307946	28826155	56.18	15841
Ft2	45034801	36804667	20741900	56.36	15738
Ft3	61475360	46227919	23333413	50.47	15930
Ft4	54492464	36209690	19497384	53.85	15839
