# Supplementary material for: The role of photorespiration during the evolution of C4 photosynthesis in the genus Flaveria
Source: eLife. 2014 Jun 16;3:e02478. doi: 10.7554/eLife.02478 (PMC4103682; doi:10.7554/eLife.02478)
Supplement: Figure 3—source data 1. — DOI: http://dx.doi.org/10.7554/eLife.02478.008 [file elife02478s003.xlsx]

## Sheet: Blatt1
RPKM
	Fp1 rpkm	Fro1 rpkm	Fc1 rpkm	Fpu1 rpkm	Fa1 rpkm	Fra1 rpkm	Fbr1 rpkm	Fb1 rpkm	Ft1 rpkm		Fp2 rpkm	Fro2 rpkm	Fc2 rpkm	Fpu2 rpkm	Fa2 rpkm	Fra2 rpkm	Fbr2 rpkm	Fb2 rpkm	Ft2 rpkm		Fp3 rpkm	Fro3 rpkm	Fc3 rpkm	Fpu3 rpkm	Fa3 rpkm	Fra3 rpkm	Fbr3 rpkm	Fb3 rpkm	Ft3 rpkm		Fp4 rpkm	Fro4 rpkm	Fc4 rpkm	Fpu4 rpkm	Fa4 rpkm	Fra4 rpkm	Fbr4 rpkm	Fb4 rpkm	Ft4 rpkm
RBCS_1	10803.9	5744.2	4919.68	3846.16	3454.74	5868.46	1462.36	367.5	862.897		7074.45	6194.06	6749.37	4907.01	6113.66	3048.31	1193.15	170.107	946.892		5775.38	4707.25	3423.83	4102.68	4314.77	4584.31	1171.69	422.792	261.177		10959.5	5488.73	5268.17	4501.57	4115.17	4177.54	1354.83	705.372	781.022
RBCS_2	14873.1	10268.4	9334.9	7864.53	8287.59	12505.3	5704.31	1592.31	2737.79		12077.6	11180.1	11169.4	10815.8	14388.7	8490.26	4518.79	980.028	2839.58		5306.31	6613.65	4938.07	6662.14	9034.32	8811.26	3651.39	1282.44	741.081		13073.4	9098.83	8719.06	7673.29	8493.72	8749.61	3974.17	2032.01	2256.83
AGT	1166.15	1814.04	1239.59	1425.14	1068.18	945.268	406.74	523.615	1271.33		660.25	927.915	687.911	860.101	1035.74	525.8	375.384	391.868	1214.67		1162.92	1709.04	1040.78	1722.12	1011.99	904.26	573.685	469.409	700.642		1132.54	1606.01	1105.05	1046.46	1155	765.59	487.408	446.66	712.906
HPR	1161.4	1261.16	1245.57	1417.63	860.945	1247.89	506.655	556.261	905.832		633.932	744.377	744.141	653.058	1048.62	648.726	506.574	346.432	750.597		925.574	1094.37	784.129	1157.99	844.11	1036.23	769.564	601.187	698.192		1080.62	1022.11	882.828	863.356	971.346	1152.77	832.696	540.788	565.352
GGT1	1180.3	1321.08	1814.38	1604.76	1738.43	1657.33	791.218	395.704	687.278		990.173	840.241	1146.22	624.611	1810.06	1388.34	837.449	298.349	670.582		1269	1552.16	1452.06	1528.71	1179.8	1309.45	1230.11	459.885	561.971		1142.41	1280.48	1654.91	895.584	1885.66	1695.21	1378.49	492.271	565.86
GOX3	1212.11	1348.98	1715.46	1952.92	1472.91	2068.07	1008.54	882.824	1382.31		1125.12	1120.23	1395.16	1302.38	1873.01	1901.03	1124.22	690.109	1568.7		1071.76	1243.25	1165.94	1470.58	1233.09	1531.44	1212.63	618.943	876.906		1334.23	1241.7	1492.43	1264.97	1699.39	1865.51	1500.51	970.58	941.777
SHM1	1450.29	1315.6	1341.06	1138.12	1439.65	1442.52	664.412	242.356	354.455		1242.46	1045.32	801.59	823.311	1820.36	1014.63	688.47	173.032	338.966		838.857	1233.27	694.851	1140.55	1121.01	986.525	884.887	273.419	268.247		1514.72	1147.37	1231.92	889.269	1529.44	1365.06	874.335	287.881	307.983
gldH1	927.585	956.497	1069.63	1200.2	1100.69	1261.49	1001.64	306.81	397.189		545.073	787.398	931.984	1028.48	1505.64	728.369	796.268	242.646	435.785		724.588	965.228	928.981	1018.67	1078.8	912.956	1157.12	245.093	269.517		1015.83	1112.92	1001.71	1004.09	1232.67	1145.05	1055.27	295.146	458.295
GS	966.096	782.402	1239.19	1169.36	1601.06	1886.02	955.138	192.658	175.327		724.696	524.235	1668.42	1228	1938.62	1053.19	806.461	147.677	161.404		819.352	836.788	1142.51	932.904	1261.59	1259.01	899.38	183.289	100.13		969.924	1372.79	1824.2	1380.74	1635.4	1685.58	1058.25	290.446	269.802
GOX2	717.702	978.05	558.577	678.603	919.761	1262.66	222.043	92.8092	152.527		889.253	672.828	475.402	549.945	1360.2	1195.18	287.837	186.491	239.057		740.141	897.622	492.067	512.768	734.931	864.393	336.98	110.508	114.602		978.31	971.318	646.223	534.811	1241.05	1290.29	362.439	322.256	171.856
gldT	719.316	573.341	675.912	1044.44	635.905	845.935	531.412	133.046	168.215		454.015	342.809	528.663	633.767	916.991	545.219	422.347	91.8857	130.488		659.491	592.402	351.765	825.271	653.51	674.775	585.271	138.078	107.686		712.415	637.111	655.427	682.858	748.843	775.346	508.984	107.809	158.39
GOX1	320.458	359.775	666.59	632.073	381.288	519.807	321.115	136.703	224.331		247.073	206.447	606.376	370.581	375.321	316.549	275.103	116.066	184.983		353.259	392.941	697.632	562.487	386.832	437.373	411.95	139.768	181.734		322.516	326.458	782.815	456.872	384.486	431.012	466.098	119.557	144.674
PGLP	710.414	502.651	537.298	559.254	381.703	558.949	268.427	152.636	251.817		458.739	399.219	526.906	464.288	532.046	359.022	216.854	101.623	190.521		300.88	504.125	398.622	559.154	367.937	394.54	248.959	166.591	149.156		709.213	562.857	665.669	638.378	510.969	513.518	348.016	258.687	242.762
gldP2	394.477	398.405	316.156	443.225	520.485	656.553	537.609	200.311	246.444		294.634	217.59	214.576	273.063	538.143	562.337	637.286	247.272	210.792		395.663	541.743	316.132	584.772	402.684	445.828	844.891	196.818	232.473		374.502	617.64	594.446	494.374	785.002	674.879	995.016	179.138	195.543
GGT2	192.81	153.482	525.514	458.457	258.865	196.25	2.72776	22.6478	30.5992		136.453	77.8977	188.222	147.297	174.237	91.9539	2.45317	15.1696	27.6955		181.088	192.421	268.082	450.538	112.021	114.147	6.68189	25.3224	24.5682		179.233	118.09	372.57	214.639	156.538	141.412	11.5168	27.4514	24.7176
SHM2	433.657	703.561	66.705	57.4925	118.59	113.925	33.3466	22.0841	22.7311		354.036	503.55	38.7655	41.3648	163.377	92.1487	34.3289	16.484	20.5713		372.45	633.756	40.0355	58.5829	100.174	71.8417	49.9146	22.7999	15.6976		447.857	573.399	61.8614	47.6438	136.187	88.3591	50.0679	23.4338	17.5757
GOGAT	172.717	150.918	117.176	224.998	178.979	192.673	130.967	28.165	37.6343		101.918	69.3538	158.808	112.664	117.752	210.396	66.984	20.415	32.6782		149.218	246.247	162.492	290.306	168.747	182.208	133.392	34.6584	39.0023		141.37	261.717	358.362	303.937	280.877	421.142	255.39	48.5375	52.5135
Bou	121.824	91.4398	95.1124	241.774	139.394	260.066	102.165	150.731	143.215		53.7117	44.3868	103.64	129.304	145.93	161.029	84.8923	58.469	95.8631		95.8395	126.741	118.045	126.065	152.834	211.235	149.132	118.02	93.181		88.0727	114.11	129.505	157.147	160.2	277.008	101.082	72.748	127.203
plgg	220.947	148.261	140.088	130.692	149.186	226.597	72.2514	41.4227	53.0209		169.791	101.602	188.042	188.028	157.749	152.24	59.4052	18.247	45.5256		171.196	162.042	135.997	156.86	162.136	191.995	66.8588	45.9873	27.4528		240.232	221.195	258.028	312.703	220.232	258.748	80.8405	69.3372	87.7902
GLYK	120.679	110.257	54.9674	58.8766	64.795	143.256	34.739	43.3708	57.467		94.6328	101.552	81.0204	83.622	120.348	121.496	28.8574	13.4743	59.8762		89.2153	134.945	53.7887	72.7907	81.0088	134.125	31.0835	35.4331	31.1787		120.146	178.316	86.4049	115.415	136.191	154.988	51.6116	73.647	85.0007
gldL1	114.853	120.36	51.9875	131.841	106.321	132.371	68.019	29.0924	31.009		68.6224	64.175	60.9349	57.6534	82.27	76.0561	64.2602	19.1535	19.6648		102.363	150.087	67.524	92.5637	102.842	129.782	86.1778	20.7021	22.1337		119.332	164.479	88.3586	95.2793	94.055	116.361	66.3399	27.8555	28.6651
gldL2	54.5783	41.5607	41.5244	55.1115	76.9141	68.2277	96.4921	59.1038	28.7309		46.3876	25.021	52.5915	48.4558	42.8082	54.1703	42.889	49.3117	20.1815		53.873	30.905	68.3602	36.3055	54.3167	64.0243	61.0541	38.3851	19.9328		45.3376	29.1914	33.0903	39.9855	32.4914	39.9072	57.8921	37.2586	20.9226
gldH2	15.7657	10.3523	4.8362	4.96902	9.3452	7.67497	7.42449	6.70042	11.9519		11.3549	10.638	6.12279	4.95813	8.35746	6.06679	4.26962	7.26325	11.2475		10.0602	10.1841	3.92192	3.78632	6.06936	7.8169	5.57898	6.76837	11.4738		9.91942	13.1605	3.72417	2.71516	7.18507	7.41341	3.18948	3.30317	9.06241
gldH3	294.666	274.919	22.4393	21.9099	24.562	25.9711	4.22113	23.4325	67.4808		128.496	194.509	15.3041	10.2361	18.5509	13.5696	4.59592	14.9662	53.8575		217.226	252.036	25.6037	25.3648	20.1346	15.5772	12.5053	25.0459	46.2339		303.366	290.136	27.6248	21.09	32.983	20.1113	7.50884	35.1817	58.7708
gldP1	412.64	239.045	140.563	50.2861	101.001	130.85	23.8576	16.5282	10.9312		326.273	141.383	68.5482	45.6551	73.3376	174.342	23.0943	15.4042	9.80156		335.006	527.934	67.9281	73.0381	82.7306	140.807	36.5384	13.4058	11.2474		372.946	496.563	100.499	41.359	157.083	189.235	34.2353	11.9434	9.38768
Dit1	89.5104	71.012	74.5526	184.35	155.103	193.098	232.459	228.146	234.781		71.7858	47.8667	185.334	138.24	162.199	113.399	209.714	54.7896	200.434		98.2796	96.7634	161.8	226.419	220.619	190.037	244.445	225.663	153.078		101.21	155.682	210.758	250.953	249.477	205.36	310.534	304.459	366.412
Dit2	35.115	28.8602	34.5838	88.8338	78.8212	121.321	110.918	88.3909	159.263		29.2174	16.3843	64.2272	51.5862	65.2328	66.8583	105.581	41.1401	120.682		39.9226	36.9086	74.6254	95.1625	98.1598	113.058	181.83	120.657	146.751		38.5571	45.0735	80.368	86.1801	81.7347	134.659	143.04	146.682	200.547
normalized
	Fp1	Fro1	Fc1	Fpu1	Fa1	Fra1	Fbr1	Fb1	Ft1		Fp2	Fro2	Fc2	Fpu2	Fa2	Fra2	Fbr2	Fb2	Ft2		Fp3	Fro3	Fc3	Fpu3	Fa3	Fra3	Fbr3	Fb3	Ft3		Fp4	Fro4	Fc4	Fpu4	Fa4	Fra4	Fbr4	Fb4	Ft4
RBCS_1	100	53.1676	45.5359	35.5996	31.9767	54.3178	13.5354	3.40153	7.98686		100	87.5554	95.4048	69.3624	86.4189	43.089	16.8656	2.40452	13.3847		100	81.5055	59.2832	71.0373	74.7098	79.3768	20.2877	7.32058	4.52225		100	50.082	48.0695	41.0747	37.549	38.1181	12.3622	6.43618	7.12645
RBCS_2	100	69.0398	62.7637	52.8776	55.722	84.0802	38.3532	10.706	18.4077		100	92.5688	92.4801	89.5527	119.135	70.2977	37.4147	8.11444	23.5112		58.735	73.2059	54.659	73.7426	100	97.531	40.4169	14.1952	8.20296		100	69.5981	66.6933	58.694	64.9696	66.9269	30.3989	15.5431	17.2628
AGT	64.2846	100	68.3328	78.5613	58.8841	52.1084	22.4218	28.8645	70.083		63.7468	89.5898	66.4174	83.0423	100	50.7657	36.2431	37.8347	117.276		67.5288	99.2408	60.4359	100	58.7644	52.5087	33.3128	27.2577	40.685		70.5187	100	68.807	65.1592	71.9174	47.6703	30.349	27.8118	44.3899
HPR	81.9257	88.9621	87.8626	100	60.7312	88.0266	35.7395	39.2387	63.8975		60.4541	70.9865	70.964	62.278	100	61.865	48.3087	33.037	71.5797		79.9297	94.5062	67.7148	100	72.8947	89.4858	66.4571	51.9166	60.2937		93.7408	88.6652	76.5831	74.894	84.2619	100	72.2343	46.912	49.0429
GGT1	65.0525	72.8115	100	88.4465	95.8142	91.3442	43.6082	21.8093	37.8795		54.7038	46.4205	63.3247	34.5077	100	76.701	46.2663	16.4828	37.0474		81.7572	100	93.551	98.4895	76.0103	84.3634	79.2517	29.6287	36.2057		67.3907	75.5351	97.6225	52.8302	111.235	100	81.3168	29.0389	33.3799
GOX3	58.6107	65.2289	82.9498	94.4323	71.2215	100	48.7673	42.6884	66.8407		59.1845	58.9276	73.3897	68.5092	98.5261	100	59.1373	36.3018	82.5183		69.9834	81.1819	76.1334	96.0258	80.5179	100	79.182	40.4157	57.2602		71.5209	66.561	80.0012	67.8082	91.0954	100	80.4346	52.0277	50.4837
SHM1	100	90.7131	92.4683	78.4752	99.2666	99.464	45.8124	16.7108	24.4403		68.2535	57.4241	44.0348	45.228	100	55.7378	37.8206	9.5054	18.6209		68.019	100	56.3422	92.4817	90.8972	79.9927	71.7514	22.1703	21.7509		99.0379	75.0192	80.5471	58.1436	100	89.2524	57.1671	18.8227	20.137
gldH1	73.531	75.8229	84.7912	95.1417	87.2532	100	79.4016	24.3212	31.4858		36.202	52.2965	61.8995	68.3085	100	48.376	52.8856	16.1158	28.9435		62.6198	83.4161	80.2836	88.0343	93.2313	78.8987	100	21.1812	23.292		82.4089	90.2852	81.2636	81.4561	100	92.8914	85.6082	23.9436	37.179
GS	51.2242	41.4844	65.7043	62.0015	84.891	100	50.6431	10.2151	9.29614		37.3821	27.0417	86.0621	63.3442	100	54.3268	41.5998	7.61764	8.32572		64.946	66.3281	90.5609	73.9468	100	99.7958	71.2894	14.5284	7.9368		53.1698	75.2545	100	75.69	89.6501	92.4011	58.0118	15.9218	14.7902
GOX2	56.8403	77.4592	44.2379	53.7437	72.8429	100	17.5853	7.35027	12.0798		65.3766	49.4653	34.9508	40.4312	100	87.8676	21.1613	13.7106	17.5751		82.4558	100	54.8189	57.1252	81.8753	96.2981	37.5414	12.3112	12.7673		75.8207	75.2788	50.0834	41.4488	96.1838	100	28.0896	24.9754	13.3192
gldT	68.8711	54.8947	64.7154	100	60.8849	80.9943	50.8802	12.7386	16.1058		49.5114	37.3841	57.6519	69.1137	100	59.4574	46.0579	10.0203	14.23		79.9121	71.7827	42.6242	100	79.1873	81.764	70.9186	16.7313	13.0485		91.8835	82.1712	84.5335	88.0714	96.5818	100	65.646	13.9046	20.4282
GOX1	48.0743	53.9724	100	94.8218	57.1998	77.98	48.1727	20.5078	33.6536		40.7459	34.0461	100	61.1141	61.8958	52.2034	45.3685	19.141	30.5063		50.6369	56.325	100	80.628	55.4492	62.694	59.0497	20.0347	26.0501		41.1995	41.703	100	58.3628	49.1159	55.0592	59.5413	15.2727	18.4813
PGLP	100	70.7546	75.6318	78.7222	53.7297	78.6794	37.7846	21.4856	35.4465		86.2217	75.0346	99.0339	87.2645	100	67.4794	40.7586	19.1004	35.8092		53.8099	90.1586	71.2902	100	65.8024	70.5601	44.5243	29.7935	26.6753		100	79.3637	93.8603	90.0122	72.0474	72.4067	49.0708	36.4752	34.2298
gldP2	60.083	60.6813	48.1538	67.5079	79.2753	100	81.8835	30.5095	37.536		46.2326	34.1432	33.6703	42.8478	84.443	88.2393	100	38.8008	33.0765		46.83	64.1198	37.4169	69.2126	47.6611	52.7675	100	23.2951	27.5151		37.6377	62.0734	59.7424	49.6851	78.8934	67.8259	100	18.0036	19.6522
GGT2	36.6898	29.2061	100	87.2397	49.2595	37.3444	0.519064	4.30964	5.82271		72.4961	41.3861	100	78.2574	92.5703	48.854	1.30334	8.05945	14.7143		40.1938	42.709	59.5025	100	24.8639	25.3357	1.48309	5.62048	5.45308		48.1072	31.696	100	57.6103	42.0157	37.9558	3.09117	7.36811	6.63435
SHM2	61.6375	100	9.48105	8.17165	16.8557	16.1926	4.73969	3.1389	3.23087		70.3081	100	7.69845	8.21463	32.4451	18.2998	6.81738	3.27357	4.08526		58.7687	100	6.31718	9.24377	15.8064	11.3359	7.87599	3.59758	2.47692		78.1056	100	10.7885	8.30902	23.7509	15.4097	8.73179	4.08683	3.06517
GOGAT	76.7639	67.0752	52.0788	100	79.5469	85.6331	58.208	12.5179	16.7265		48.4411	61.5581	140.957	100	104.516	100	59.4548	18.1203	29.005		81.8946	84.8234	55.9728	100	58.1271	100	45.9488	11.9386	13.4349		33.5682	62.1445	85.0928	72.1697	66.6942	100	60.6421	11.5252	12.4693
Bou	46.8434	35.1602	36.5723	92.9662	53.5992	100	39.2842	57.9586	55.0687		33.3554	27.5645	64.3614	80.2985	90.6239	100	52.7188	36.3097	59.5317		45.3711	60	55.8833	59.6799	72.3525	100	70.6	55.8714	44.1126		31.7943	41.1938	46.7512	56.7301	57.8321	100	36.4908	26.262	45.9203
plgg	97.5067	65.4294	61.8225	57.6762	65.8378	100	31.8855	18.2804	23.3988		90.2937	54.0314	100	99.9922	83.89	80.9605	31.5914	9.70365	24.2103		89.1668	84.3988	70.8338	81.7	84.4478	100	34.8232	23.9523	14.2987		92.844	85.4865	99.7215	120.852	85.1145	100	31.2429	26.7972	33.9288
GLYK	84.2403	76.965	38.3701	41.099	45.2304	100	24.2496	30.2751	40.115		77.8895	83.5842	66.6855	68.8268	99.0548	100	23.7517	11.0903	49.2823		66.1123	100	39.8597	53.9409	60.0309	99.3926	23.0342	26.2574	23.1047		67.3784	100	48.4561	64.7249	76.3761	86.918	28.9439	41.3014	47.6686
gldL1	86.7661	90.926	39.274	99.5993	80.3201	100	51.385	21.9779	23.4258		83.4112	78.0054	74.067	70.0782	100	92.4469	78.1089	23.2813	23.9028		68.2022	100	44.9898	61.6732	68.5217	86.4708	57.4184	13.7934	14.7472		72.5513	100	53.7202	57.9279	57.1836	70.7451	40.3334	16.9356	17.4278
gldL2	56.5625	43.0716	43.034	57.115	79.7102	70.7081	100	61.2525	29.7754		88.2037	47.5762	100	92.1363	81.3977	103.002	81.5513	93.7637	38.3742		78.8076	45.209	100	53.1092	79.4566	93.6572	89.3124	56.1512	29.1585		78.3139	50.4238	57.1586	69.0691	56.1241	68.9338	100	64.3586	36.1407
gldH2	100	65.6635	30.6756	31.518	59.2756	48.6815	47.0928	42.5001	75.8099		100	93.6863	53.9218	43.665	73.602	53.4287	37.6014	63.9655	99.0538		87.6796	88.7596	34.1815	32.9997	52.8976	68.1282	48.6236	58.9897	100		75.3728	100	28.2982	20.6312	54.5958	56.3309	24.2353	25.0991	68.8608
gldH3	100	93.2986	7.61516	7.43551	8.33554	8.81373	1.43252	7.95223	22.9008		66.0617	100	7.86805	5.2625	9.53726	6.97632	2.36283	7.69436	27.6889		86.1886	100	10.1588	10.064	7.98877	6.18053	4.9617	9.93743	18.3442		100	95.639	9.1061	6.952	10.8723	6.62937	2.47518	11.5971	19.3729
gldP1	100	57.9307	34.0643	12.1864	24.4768	31.7105	5.7817	4.00549	2.64909		100	43.3327	21.0095	13.9929	22.4774	53.4345	7.07823	4.72126	3.0041		63.4561	100	12.8668	13.8347	15.6706	26.6714	6.92101	2.53929	2.13046		75.1054	100	20.2389	8.32906	31.6341	38.1089	6.89446	2.40522	1.89053
Dit1	38.1251	30.2461	31.7541	78.5202	66.0631	82.2459	99.011	97.1742	100		34.2304	22.8248	88.3748	65.9182	77.3429	54.0732	100	26.1259	95.5749		40.2052	39.5849	66.1907	92.6257	90.253	77.7423	100	92.3164	62.6226		27.622	42.4882	57.5194	68.4894	68.0866	56.0463	84.75	83.0921	100
Dit2	22.0485	18.1211	21.7149	55.7781	49.4913	76.1767	69.6449	55.5001	100		24.2103	13.5764	53.2203	42.7456	54.0536	55.4005	87.4868	34.0897	100		21.956	20.2984	41.0414	52.3361	53.9844	62.178	100	66.3571	80.7079		19.226	22.4753	40.0745	42.9726	40.7559	67.1458	71.3252	73.1411	100
