# Supplementary material for: The role of photorespiration during the evolution of C4 photosynthesis in the genus Flaveria
Source: eLife. 2014 Jun 16;3:e02478. doi: 10.7554/eLife.02478 (PMC4103682; doi:10.7554/eLife.02478)
Supplement: Figure 3—source data 2. — DOI: http://dx.doi.org/10.7554/eLife.02478.009 [file elife02478s004.xlsx]

## Sheet: Blatt1
	Fp1	Fro1	Fc1	Fpu1	Fa1	Fra1	Fbr1	Fb1	Ft1			Fp2	Fro2	Fc2	Fpu2	Fa2	Fra2	Fbr2	Fb2	Ft2			Fp3	Fro3	Fc3	Fpu3	Fa3	Fra3	Fbr3	Fb3	Ft3			Fp4	Fro4	Fc4	Fpu4	Fa4	Fra4	Fbr4	Fb4	Ft4
HPR	69.4	88.2	47.9	48.6	100	75	50.7	19.4	24.3		HPR	69.4	100	70.1	97.9	58.3	51.4	29.2	32.6	19.4		HPR	72.2	75.1	52.3	100	67.1	66.8	46.6	49.5	23.5		HPR	91.7	100	69.7	84.4	72.9	111.9	87.2	50.5	26.6
PGLP	100	78	41	54	30	65	42	29	22		PGLP	54.6	38.8	58.5	82	100	39.9	31.7	23.5	37.2		PGLP	71.9	50.4	72.7	100	34.5	38.8	15.1	10.1	19.4		PGLP	100	84	67	82	60	82	30	17	18
GLDL	85.5	88	58.1	84.6	100	92.3	79.5	56.4	41.9		GLDL	87	96.5	72.2	99.1	93.9	100	65.2	40	33		GLDL	92.6	89.4	66.2	100	90.7	100	56	48.1	34.3		GLDL	87.7	83.3	60.1	82.9	75	100	59.6	37.3	22.8
GLDP	77.5	96.9	62.8	68.2	100	82.2	97.7	39.5	23.3		GLDP	98	83.3	46.1	59.8	79.4	100	64.7	45.1	42.2		GLDP	73.5	88.2	97.8	83.8	100	89.7	30.1	31.6	25.7		GLDP	100	100	72	33	81	85	78	32	30
GLDT	87.7	78.1	87.7	75.4	100	79.8	61.4	66.7	34.2		GLDT	85.5	76.1	84.6	68.4	100	93.2	68.4	41.9	23.1		GLDT	75.2	78.2	61.7	100	75.9	89.5	24.1	21.1	8.3		GLDT	99	100	69.3	91.1	77.2	88.1	63.9	29.7	23.8
SHM2	62.5	67.5	63.8	65.6	100	68.8	38.1	16.3	17.5		SHM2	85.5	33.3	76.9	79.5	80.3	100	41.9	22.2	17.9		SHM2	72.5	57.2	84.1	100	87	82.6	51.4	18.1	10.1		SHM2	100	88	71	56	95	81	80	20	5
GLYK	45.5	100	95.5	63.6	48.2	82.7	54.1	35	36.8		GLYK	82.6	100	93.4	72.7	76.9	83.5	30.6	42.1	48.8		GLYK	67.6	91.9	68.9	64.2	83.8	100	35.1	45.3	26.4		GLYK	87	85.2	98.3	62.6	77.4	100	36.5	33.9	20.9
