# Supplementary material for: The role of photorespiration during the evolution of C4 photosynthesis in the genus Flaveria
Source: eLife. 2014 Jun 16;3:e02478. doi: 10.7554/eLife.02478 (PMC4103682; doi:10.7554/eLife.02478)
Supplement: Figure 4—source data 1. — DOI: http://dx.doi.org/10.7554/eLife.02478.013 [file elife02478s005.xlsx]

## Sheet: Multiple AA (Fig. 4A)
Fluxes over plasmodesmata depending on the weight on plasmodesmatal fluxes including flux variability. Major amino acids and the corresponding oxoacids and dicarbonic acids are allowed to freely diffuse between cells.
		weight on plasmodesmatal flux: 1			weight on plasmodesmatal flux: 1.1			weight on plasmodesmatal flux: 2			weight on plasmodesmatal flux: 3			weight on plasmodesmatal flux: 4			weight on plasmodesmatal flux: 5
name	react_id	flux	min	max	flux	min	max	flux	min	max	flux	min	max	flux	min	max	flux	min	max
gly MtoBS	TMBgly	6.033	6.033	6.033	6.033	6.033	6.033	6.033	6.033	6.036	6.033	6.033	6.222	6.033	6.033	6.038	6.033	6.033	6.034
Ser MtoBs	TMBser	-3.017	-3.017	-3.017	-3.017	-3.017	-3.017	-3.017	-3.031	-3.017	-3.017	-3.213	-3.017	-3.017	-3.054	-3.017	-3.017	-3.02	-3.017
glu MtoBS	TMBglu	-2.007	-2.065	-2.007	-2.007	-2.065	-2.007	-1.98	-2.065	-1.932	-1.985	-2.043	0.343	0	-0.024	0.008	0	-0.001	0.001
gln MtoBS	TMBgln	-0.402	-0.402	-0.402	-0.402	-0.402	-0.402	-0.425	-0.428	-0.396	-0.402	-1.64	-0.402	-1.41	-1.434	-1.384	-1.399	-1.409	-1.398
asn MtoBS	TMBasn	0	0	0	0	0	0	0.024	-0.006	0.024	0	-0.267	0.095	0	-0.011	0.012	0	-0.001	0.001
thr MtoBS	TMBthr	0	0	0	0	0	0	0	-0.011	0.009	0	-0.092	0.018	0	-0.065	0.004	-0.03	-0.03	-0.006
aKG MtoBS	TMBaKG	2.418	2.418	2.476	2.418	2.418	2.476	2.414	2.37	2.476	2.396	0.998	2.454	1.416	1.352	1.416	1.373	1.373	1.391
H2O MtoBS	TMBh2o	0	0	0	0	0	0	0	-0.01	0.01	0	-0.588	0.588	0	-0.012	0.012	0	-0.001	0.001
Malate MtoBs	TMB01	0	0	0	0	0	0	0	0	0.032	0.026	-0.179	0.443	0.056	0.032	0.083	0.071	0.05	0.071
pyruvate MtoBS	TMB02	0.178	0.12	0.178	0.178	0.12	0.178	0.186	0.102	0.2	0.178	-0.27	0.765	0	-0.008	0.019	0	-0.001	0.001
Phosphoglycerate Mto BS	TMB03	0	0	0	0	0	0	0	-0.004	0.019	0	-0.225	0.586	0	-0.005	0.011	0	0	0.001
DHAP MtoB	TMB04	0	0	0	0	0	0	0	-0.006	0.014	0	-0.299	0.391	0	-0.006	0.011	0	0	0.001
GAP MtoBs	TMB05	0	0	0	0	0	0	0	-0.006	0.014	0	-0.294	0.49	0	-0.006	0.011	0	0	0.001
Pi MtoB	TMB06	0	0	0	0	0	0	0	-0.01	0.007	0	-0.424	0.381	0	-0.008	0.008	0	-0.001	0.001
Pyrophosphate MtoB	TMB07	0	0	0	0	0	0	0	-0.01	0.003	0	-0.293	0.196	0	-0.006	0.004	0	0	0
Sucrose MtoB	TMB08	0.409	0.409	0.409	0.409	0.409	0.409	0.409	0.404	0.413	0.409	0.258	0.504	0.406	0.394	0.414	0.405	0.405	0.407
Aspartate MtoB	TMB09	0.026	0.026	0.026	0.026	0.026	0.026	0	-0.006	0.026	0	-0.357	0.348	0	-0.008	0.02	0	-0.001	0.002
Alanine Mto B	TMB10	-0.058	-0.058	0	-0.058	-0.058	0	-0.058	-0.068	0.005	-0.058	-0.666	0.198	-0.061	-0.094	0.002	-0.062	-0.065	-0.05
CO2 MtoB	TMB11	-2.002	-2.002	-2.002	-2.002	-2.002	-2.002	-2.002	-2.006	-2.002	-2.002	-2.218	-2.002	-2.002	-2.007	-2.002	-2.002	-2.002	-2.002
O2 MtoB	TMB12	-1.213	-1.213	-1.213	-1.213	-1.213	-1.213	-1.214	-1.223	-1.2	-1.214	-1.214	-0.08	-0.501	-0.501	-0.34	-0.369	-0.377	-0.361
PEP M to B	TMB13	0	0	0	0	0	0	0	0	0	0	0	0	0	0	0	0	0	0

## Sheet: aKG constrained (Fig. 4B)
Fluxes over plasmodesmata depending on the weight on plasmodesmatal fluxes including flux variability. 2-oxoglutarate transfer between mesophyll and bundle sheath is constrained.
		weight on plasmodesmatal flux: 1			weight on plasmodesmatal flux: 1.1			weight on plasmodesmatal flux: 2			weight on plasmodesmatal flux: 3			weight on plasmodesmatal flux: 4			weight on plasmodesmatal flux: 5
name	react_id	flux	min	max	flux	min	max	flux	min	max	flux	min	max	flux	min	max	flux	min	max
gly MtoBS	TMBgly	6.033	6.033	6.033	6.033	6.033	6.033	6.033	6.033	6.033	6.033	6.033	6.067	6.033	6.033	6.036	6.033	6.033	6.038
Ser MtoBs	TMBser	-3.017	-3.017	-3.017	-3.017	-3.022	-3.017	-3.017	-3.021	-3.017	-3.017	-3.169	-3.017	-3.1	-3.119	-3.048	-3.094	-3.137	-3.028
glu MtoBS	TMBglu	0	0	0	0	0	0	0	0	0	0	0	0	0	0	0	0	0	0
gln MtoBS	TMBgln	-0.138	-0.138	-0.138	-0.138	-0.138	-0.076	-0.138	-0.138	-0.076	-0.138	-0.153	-0.061	-0.152	-0.152	-0.14	-0.152	-0.152	-0.135
asn MtoBS	TMBasn	-0.22	-0.22	-0.22	-0.22	-0.22	-0.218	-0.22	-0.22	-0.219	-0.22	-0.266	-0.174	-0.241	-0.244	-0.236	-0.241	-0.248	-0.232
thr MtoBS	TMBthr	-0.084	-0.083	-0.083	-0.084	-0.083	-0.083	-0.084	-0.083	-0.083	-0.084	-0.093	-0.051	-0.092	-0.092	-0.088	-0.092	-0.092	-0.084
aKG MtoBS	TMBaKG	0	0	0	0	0	0	0	0	0	0	0	0	0	0	0	0	0	0
H2O MtoBS	TMBh2o	0	0	0	0	-0.001	0.001	0	-0.001	0.001	0	-0.121	0.121	0	-0.008	0.008	0	-0.015	0.015
Malate MtoBs	TMB01	0.039	0.039	0.039	0.039	0.039	0.266	0.207	0.207	0.267	0.207	0.159	0.421	0.29	0.283	0.302	0.291	0.278	0.312
pyruvate MtoBS	TMB02	2.546	2.546	2.546	2.546	2.449	2.546	2.4	2.4	2.451	2.4	1.889	2.471	2.156	2.101	2.156	2.154	2.077	2.154
Phosphoglycerate Mto BS	TMB03	0.164	0.164	0.164	0.164	0.048	0.164	0.164	0.043	0.164	0.164	-0.046	0.264	0	-0.003	0.018	0	-0.006	0.033
DHAP MtoB	TMB04	0	0	0	0	-0.001	0.002	0	-0.001	0.004	0	-0.063	0.109	0	-0.004	0.008	0	-0.008	0.019
GAP MtoBs	TMB05	0	0	0	0	-0.001	0.002	0	-0.001	0.004	0	-0.063	0.13	0	-0.004	0.012	0	-0.008	0.021
Pi MtoB	TMB06	0	0	0	0	-0.003	0.001	0	-0.002	0.001	0	-0.126	0.081	0	-0.009	0.005	0	-0.016	0.01
Pyrophosphate MtoB	TMB07	-0.082	-0.082	-0.082	-0.082	-0.082	-0.024	-0.082	-0.082	-0.022	-0.082	-0.132	0.04	0	-0.009	0.003	0	-0.017	0.005
Sucrose MtoB	TMB08	0.407	0.407	0.407	0.407	0.407	0.407	0.407	0.407	0.409	0.407	0.369	0.455	0.402	0.401	0.414	0.402	0.401	0.419
Aspartate MtoB	TMB09	0.169	0.169	0.169	0.169	0	0.169	0	-0.001	0.001	0	-0.117	0.111	0	-0.009	0.007	0	-0.019	0.012
Alanine Mto B	TMB10	-2.296	-2.296	-2.296	-2.296	-2.35	-2.257	-2.15	-2.26	-2.15	-2.15	-2.28	-1.869	-2.002	-2.048	-1.984	-2.007	-2.066	-1.966
CO2 MtoB	TMB11	-2.002	-2.002	-2.002	-2.002	-2.002	-2.002	-2.002	-2.002	-2.002	-2.002	-2.05	-2.002	-2.002	-2.005	-2.002	-2.002	-2.009	-2.002
O2 MtoB	TMB12	-1.231	-1.231	-1.231	-1.231	-1.256	-1.231	-1.239	-1.257	-1.239	-1.239	-1.257	-0.442	-0.523	-0.527	-0.487	-0.521	-0.528	-0.467
PEP M to B	TMB13	0	0	0	0	0	0	0	0	0	0	0	0	0	0	0	0	0	0

## Sheet: aKG Ala constrained (Fig. 4C)
Fluxes over plasmodesmata depending on the weight on plasmodesmatal fluxes including flux variability. 2-oxoglutarate and alanine transfer between mesophyll and bundle sheath is constrained
		weight on plasmodesmatal flux: 1			weight on plasmodesmatal flux: 1.1			weight on plasmodesmatal flux: 2			weight on plasmodesmatal flux: 3			weight on plasmodesmatal flux: 4			weight on plasmodesmatal flux: 5
name	react_id	flux	min	max	flux	min	max	flux	min	max	flux	min	max	flux	min	max	flux	min	max
gly MtoBS	TMBgly	6.033	6.033	6.033	6.033	6.033	6.033	6.033	6.033	6.033	6.033	6.033	6.033	6.033	6.033	6.046	6.033	6.033	6.151
Ser MtoBs	TMBser	-3.125	-3.125	-3.125	-3.125	-3.125	-3.125	-3.126	-3.126	-3.126	-3.126	-3.126	-3.126	-3.126	-3.162	-3.081	-3.133	-3.41	-3.017
glu MtoBS	TMBglu	0	0	0	0	0	0	0	0	0	0	0	0	0	0	0	0	0	0
gln MtoBS	TMBgln	-0.136	-0.137	-0.137	-0.136	-0.137	-0.137	-0.137	-0.137	-0.137	-0.137	-0.137	-0.137	-0.137	-0.156	-0.116	-0.141	-0.156	-0.036
asn MtoBS	TMBasn	-0.217	-0.217	-0.217	-0.217	-0.217	-0.217	-0.218	-0.219	-0.219	-0.218	-0.219	-0.219	-0.219	-0.358	-0.207	-0.225	-1.469	-0.174
thr MtoBS	TMBthr	-0.082	-0.082	-0.082	-0.082	-0.082	-0.082	-0.083	-0.083	-0.083	-0.083	-0.083	-0.083	-0.083	-0.094	-0.075	-0.085	-0.094	-0.003
aKG MtoBS	TMBaKG	0	0	0	0	0	0	0	0	0	0	0	0	0	0	0	0	0	0
H2O MtoBS	TMBh2o	0	0	0	0	0	0	0	0	0	0	0	0	0	-0.053	0.053	0	-0.455	0.455
Malate MtoBs	TMB01	2.549	2.549	2.549	2.549	2.549	2.549	2.548	2.548	2.548	2.548	2.548	2.548	2.548	2.402	2.625	2.545	1.23	2.773
pyruvate MtoBS	TMB02	0	0	0	0	0	0	0	0	0	0	0	0	0	0	0	0	0	0
Phosphoglycerate Mto BS	TMB03	0.563	0.563	0.563	0.563	0.563	0.563	0.546	0.546	0.546	0.546	0.545	0.546	0.546	0.079	0.546	0.447	-0.148	0.617
DHAP MtoB	TMB04	0	0	0	0	0	0	0	0	0	0	0	0	0	-0.038	0.092	0	-0.3	0.437
GAP MtoBs	TMB05	0	0	0	0	0	0	0	0	0	0	0	0	0	-0.038	0.092	0	-0.3	0.452
Pi MtoB	TMB06	0	0	0	0	0	0	0	0	0	0	0	0	0	-0.107	0.036	0	-0.418	0.304
Pyrophosphate MtoB	TMB07	-0.282	-0.282	-0.282	-0.282	-0.282	-0.282	-0.273	-0.273	-0.273	-0.273	-0.273	-0.273	-0.273	-0.273	-0.038	-0.223	-0.309	0.135
Sucrose MtoB	TMB08	0.408	0.408	0.408	0.408	0.408	0.408	0.407	0.407	0.407	0.407	0.407	0.407	0.407	0.397	0.471	0.406	0.271	0.532
Aspartate MtoB	TMB09	-2.351	-2.351	-2.351	-2.351	-2.351	-2.351	-2.346	-2.346	-2.346	-2.346	-2.346	-2.346	-2.346	-2.398	-2.041	-2.318	-2.454	0.234
Alanine Mto B	TMB10	0	0	0	0	0	0	0	0	0	0	0	0	0	0	0	0	0	0
CO2 MtoB	TMB11	-2.002	-2.002	-2.002	-2.002	-2.002	-2.002	-2.002	-2.002	-2.002	-2.002	-2.002	-2.002	-2.002	-2.024	-2.002	-2.002	-2.192	-2.002
O2 MtoB	TMB12	-1.298	-1.298	-1.298	-1.298	-1.298	-1.298	-1.261	-1.261	-1.261	-1.261	-1.261	-1.261	-1.261	-1.281	-0.321	-1.057	-1.182	0.183
PEP M to B	TMB13	0	0	0	0	0	0	0	0	0	0	0	0	0	0	0	0	0	0

## Sheet: Ser and Gly only (Fig. 4D)
Fluxes over plasmodesmata depending on the weight on plasmodesmatal fluxes including flux variability. Only glycine and serine transfer between mesophyll and bundle sheath is allowed
		weight on plasmodesmatal flux: 1			weight on plasmodesmatal flux: 1.1			weight on plasmodesmatal flux: 2			weight on plasmodesmatal flux: 3			weight on plasmodesmatal flux: 4			weight on plasmodesmatal flux: 5
name	react_id	flux	min	max	flux	min	max	flux	min	max	flux	min	max	flux	min	max	flux	min	max
gly MtoBS	TMBgly	6.033	6.033	6.033	6.033	6.033	6.033	6.033	6.033	6.033	6.033	6.033	6.041	6.033	6.033	6.048	6.033	6.033	6.066
Ser MtoBs	TMBser	-5.924	-5.924	-5.924	-5.924	-5.924	-5.924	-5.925	-5.925	-5.925	-5.925	-5.96	-5.905	-5.923	-5.956	-5.882	-5.911	-5.971	-5.837
glu MtoBS	TMBglu	0	0	0	0	0	0	0	0	0	0	0	0	0	0	0	0	0	0
gln MtoBS	TMBgln	0	0	0	0	0	0	0	0	0	0	0	0	0	0	0	0	0	0
asn MtoBS	TMBasn	0	0	0	0	0	0	0	0	0	0	0	0	0	0	0	0	0	0
thr MtoBS	TMBthr	0	0	0	0	0	0	0	0	0	0	0	0	0	0	0	0	0	0
aKG MtoBS	TMBaKG	0	0	0	0	0	0	0	0	0	0	0	0	0	0	0	0	0	0
H2O MtoBS	TMBh2o	0	0	0	0	0	0	0	0	0	0	-0.064	0.064	0	-0.096	0.096	0	-0.188	0.188
Malate MtoBs	TMB01	-0.063	-0.063	-0.063	-0.063	-0.063	-0.063	-0.052	-0.052	-0.052	-0.052	-0.063	0.026	-0.031	-0.056	0.066	0	-0.029	0.129
pyruvate MtoBS	TMB02	0	0	0	0	0	0	0.23	0.23	0.23	0.229	0.071	0.245	0.203	-0.017	0.237	0.165	-0.051	0.261
Phosphoglycerate Mto BS	TMB03	3.509	3.509	3.509	3.509	3.509	3.509	3.221	3.221	3.221	3.217	2.851	3.252	3.123	2.517	3.131	2.971	1.756	3.038
DHAP MtoB	TMB04	0	0	0	0	0	0	0	0	0	0	-0.067	0.061	0	-0.09	0.103	0	-0.156	0.237
GAP MtoBs	TMB05	0	0	0	0	0	0	0	0	0	0	-0.067	0.061	0	-0.09	0.103	0	-0.156	0.237
Pi MtoB	TMB06	-2.833	-2.833	-2.833	-2.833	-2.833	-2.833	-2.581	-2.581	-2.581	-2.551	-2.68	-2.332	-2.532	-2.657	-2.192	-2.493	-2.75	-1.358
Pyrophosphate MtoB	TMB07	-0.338	-0.338	-0.338	-0.338	-0.338	-0.338	-0.32	-0.32	-0.32	-0.333	-0.334	-0.211	-0.296	-0.298	-0.054	-0.239	-0.319	0.015
Sucrose MtoB	TMB08	0.415	0.415	0.415	0.415	0.415	0.415	0.414	0.415	0.415	0.414	0.388	0.51	0.413	0.39	0.52	0.41	0.374	0.742
Aspartate MtoB	TMB09	0	0	0	0	0	0	0	0	0	0	0	0	0	0	0	0	0	0
Alanine Mto B	TMB10	0	0	0	0	0	0	0	0	0	0	0	0	0	0	0	0	0	0
CO2 MtoB	TMB11	-2.002	-2.002	-2.002	-2.002	-2.002	-2.002	-2.002	-2.002	-2.002	-2.002	-2.072	-2.002	-2.002	-2.06	-2.002	-2.002	-2.107	-2.002
O2 MtoB	TMB12	-1.027	-1.027	-1.027	-1.027	-1.027	-1.027	-0.925	-0.925	-0.925	-0.916	-0.936	-0.538	-0.694	-0.838	0.041	-0.327	-0.524	0.108
PEP M to B	TMB13	0	0	0	0	0	0	0	0	0	0	0	0	0	0	0	0	0	0
