# Supplementary material for: The role of photorespiration during the evolution of C4 photosynthesis in the genus Flaveria
Source: eLife. 2014 Jun 16;3:e02478. doi: 10.7554/eLife.02478 (PMC4103682; doi:10.7554/eLife.02478)
Supplement: Figure 5—source data 1. — DOI: http://dx.doi.org/10.7554/eLife.02478.015 [file elife02478s006.xlsx]

## Sheet: Blatt1
Fluxes over plasmodesmata depending on the weight on plasmodesmatal fluxes including flux variability. Major amino acids and the corresponding oxoacids and dicarbonic acids are allowed to freely diffuse between cells, C4 cycle is active
		weight on plasmodesmatal flux: 1			weight on plasmodesmatal flux: 1.1			weight on plasmodesmatal flux: 2			weight on plasmodesmatal flux: 3			weight on plasmodesmatal flux: 4			weight on plasmodesmatal flux: 5
name	react_id	flux	min	max	flux	min	max	flux	min	max	flux	min	max	flux	min	max	flux	min	max
gly MtoBS	TMBgly	6.033	6.033	6.033	6.033	6.033	6.033	6.033	6.033	6.052	6.033	6.033	6.065	6.033	6.033	6.043	6.033	6.033	6.043
Ser MtoBs	TMBser	-3.065	-3.065	-3.065	-3.065	-3.065	-3.065	-3.065	-3.075	-3.017	-3.017	-3.084	-3.017	-3.017	-3.071	-3.017	-3.017	-3.07	-3.017
glu MtoBS	TMBglu	-2.135	-2.135	0	0	0	0	0	-0.035	0.032	0	-0.052	0.058	0	-0.016	0.018	0	-0.016	0.018
gln MtoBS	TMBgln	-0.426	-0.426	-0.426	-0.426	-0.426	-0.426	-0.426	-0.428	-0.252	-0.377	-0.377	-0.2	-0.31	-0.31	-0.228	-0.31	-0.31	-0.227
asn MtoBS	TMBasn	0.067	0.067	0.067	0.067	0.067	0.067	0.067	-0.022	0.067	0	-0.043	0.065	0	-0.014	0.021	0	-0.015	0.02
thr MtoBS	TMBthr	-0.072	-0.072	-0.072	-0.072	-0.072	-0.072	-0.072	-0.074	-0.063	-0.075	-0.076	-0.049	-0.075	-0.075	-0.064	-0.075	-0.075	-0.061
aKG MtoBS	TMBaKG	2.442	0.307	2.442	0.307	0.307	0.307	0.307	0.133	0.312	0.252	0.079	0.252	0.186	0.108	0.186	0.186	0.103	0.186
H2O MtoBS	TMBh2o	0	0	0	0	0	0	0	-0.035	0.035	0	-0.055	0.055	0	-0.017	0.017	0	-0.017	0.017
Malate MtoBs	TMB01	3.017	3.017	3.017	3.017	3.017	3.017	3.017	2.987	3.222	3.057	3.006	3.266	3.054	3.054	3.237	3.054	3.054	3.237
pyruvate MtoBS	TMB02	-2.237	-2.237	-0.102	-0.102	-0.102	-0.102	-0.102	-0.225	0.017	-0.134	-0.191	0.032	0	-0.038	0.011	0	-0.032	0.011
Phosphoglycerate Mto BS	TMB03	0	0	0	0	0	0	0	-0.017	0.022	0	-0.027	0.035	0	-0.009	0.011	0	-0.009	0.011
DHAP MtoB	TMB04	0	0	0	0	0	0	0	-0.021	0.026	0	-0.033	0.042	0	-0.01	0.013	0	-0.01	0.013
GAP MtoBs	TMB05	0	0	0	0	0	0	0	-0.021	0.026	0	-0.033	0.042	0	-0.01	0.013	0	-0.01	0.013
Pi MtoB	TMB06	0	0	0	0	0	0	0	-0.023	0.023	0	-0.037	0.037	0	-0.011	0.011	0	-0.011	0.011
Pyrophosphate MtoB	TMB07	0	0	0	0	0	0	0	-0.013	0.012	0	-0.021	0.018	0	-0.006	0.006	0	-0.007	0.006
Sucrose MtoB	TMB08	0.398	0.398	0.398	0.398	0.398	0.398	0.398	0.36	0.401	0.37	0.332	0.409	0.372	0.365	0.397	0.372	0.365	0.397
Aspartate MtoB	TMB09	0.125	0.125	0.125	0.125	0.125	0.125	0.125	-0.006	0.226	0.179	-0.029	0.23	0.18	-0.009	0.18	0.18	-0.009	0.18
Alanine Mto B	TMB10	-0.052	-2.187	-0.052	-2.187	-2.187	-2.187	-2.187	-2.333	-2.083	-2.251	-2.411	-2.155	-2.377	-2.377	-2.299	-2.377	-2.386	-2.301
CO2 MtoB	TMB11	-4.976	-4.976	-4.976	-4.976	-4.976	-4.976	-4.976	-4.984	-4.976	-4.976	-4.991	-4.976	-4.976	-4.981	-4.976	-4.976	-4.981	-4.976
O2 MtoB	TMB12	-1.144	-1.144	-1.144	-1.144	-1.144	-1.144	-1.144	-1.258	-1.047	-0.902	-1.274	-0.881	-0.925	-1.116	-0.925	-0.925	-1.103	-0.897
PEP M to B	TMB13	0	0	0	0	0	0	0	0	0	0	0	0	0	0	0	0	0	0
