# Supplementary material for: The role of photorespiration during the evolution of C4 photosynthesis in the genus Flaveria
Source: eLife. 2014 Jun 16;3:e02478. doi: 10.7554/eLife.02478 (PMC4103682; doi:10.7554/eLife.02478)
Supplement: Figure 6—source data 1. — DOI: http://dx.doi.org/10.7554/eLife.02478.017 [file elife02478s007.xlsx]

## Sheet: Blatt1
RPKM
	Fp1 rpkm	Fro1 rpkm	Fc1 rpkm	Fpu1 rpkm	Fa1 rpkm	Fra1 rpkm	Fbr1 rpkm	Fb1 rpkm	Ft1 rpkm		Fp2 rpkm	Fro2 rpkm	Fc2 rpkm	Fpu2 rpkm	Fa2 rpkm	Fra2 rpkm	Fbr2 rpkm	Fb2 rpkm	Ft2 rpkm		Fp3 rpkm	Fro3 rpkm	Fc3 rpkm	Fpu3 rpkm	Fa3 rpkm	Fra3 rpkm	Fbr3 rpkm	Fb3 rpkm	Ft3 rpkm		Fp4 rpkm	Fro4 rpkm	Fc4 rpkm	Fpu4 rpkm	Fa4 rpkm	Fra4 rpkm	Fbr4 rpkm	Fb4 rpkm	Ft4 rpkm
PEPC	152.556	149.164	258.11	704.261	1078.6	1377.2	1565.27	4114.15	8979.62		146.682	64.3731	164.257	200.794	729.983	1317.66	1112.64	2002.29	9119.54		188.201	137.717	303.868	668.213	905.254	1770.64	1556.16	5676.93	5978.83		139.682	816.621	183.687	281.726	912.924	1859.77	2608.6	7874.9	9735.16
PPDK	152.147	133.457	394.145	1146.68	882.011	1240.51	1556.35	3972.56	6333.74		72.8058	51.5159	169.091	407.875	638.014	672.63	1153.69	1440.21	5032.82		98.3166	126.561	241.764	842.358	476.149	627.428	1267.72	3072.99	4809.65		131.912	422.218	365.446	747.043	810.671	1060.49	2640.83	5578.73	5425.94
NADP-ME	66.5603	42.9105	637.001	1263.31	1335.87	1780.62	1986.31	2797.96	3083.71		72.231	50.8364	369.501	767.743	1621.68	2551.77	2614.41	2206.06	3548.07		69.5053	53.959	513.408	1340.25	1171.69	1961.41	3503.09	2292.67	2954.56		60.3901	339.804	897.146	1081.07	1754.87	2615.17	3617.23	3243.64	3323.73
cp-NADP-MDH	203.358	185.916	375.496	491.247	682.079	587.801	950.805	1477.57	2706.75		156.229	65.8195	215.717	295.576	695.356	272.016	903.241	556.512	2087.18		188.504	175.446	261.37	414.82	467.365	393.535	1236	1240.97	1335.72		200.885	287.658	295.731	312.188	626.116	454.965	1629.76	2224.14	2242.81
AlaAT	53.9486	57.5347	185.032	357.543	612.911	762.892	700.195	903.157	1020.75		49.8466	44.3962	162.678	267.716	388.179	491.594	535.317	402.614	773.038		67.9313	84.1756	281.084	385.433	680.417	608.967	865.765	542.394	581.781		49.4286	115.928	243.882	413.764	529.657	594.617	1222.41	695.311	983.861
AspAT5	66.9614	43.6003	200.448	128.287	164.739	178.955	378.378	453.709	751.56		60.9542	34.0516	161.257	118.542	136.627	127.304	276.278	118.086	459.284		70.1811	40.2811	223.881	114.024	124.484	135.152	390.029	346.097	325.362		62.4349	85.9103	203.225	140.349	176.61	144.632	429.324	645.3	758.116
BASS2	138.334	123.276	238.349	455.889	542.311	886.634	1020.06	2160.6	2806.03		187.097	92.9695	329.353	562.312	729.27	708.082	911.147	1020.9	2505.99		211.325	136.734	593.294	567.374	690.205	1293.32	1036.31	2331.65	2151.76		140.02	392.078	256.259	545.245	578.281	756	1478.44	2742.46	3293.7
NHD	26.4171	32.9099	26.4409	67.363	62.9863	108.928	227.99	500.308	858.857		29.5649	18.0104	28.3115	56.9713	64.4651	100.209	185.427	283.823	714.153		29.4377	28.9947	39.1337	63.7249	70.0728	99.3391	392.316	457.813	685.112		29.2464	77.4719	31.4709	59.9172	90.1013	132.335	405.865	806.14	768.735
CUE1	92.3066	99.7488	82.0653	127.686	118.153	133.475	86.8261	495.664	513.776		42.7643	55.3628	53.6592	60.5635	108.478	68.1073	75.9834	197.819	391.584		76.4838	74.9876	92.4943	185.275	114.466	108.112	111.595	423.505	340.671		35.4239	64.0877	51.3274	71.8294	114.822	75.1752	142.012	264.264	369.887
PPT2	198.406	176.748	115.314	228.122	227.026	242.221	100.421	217.483	375.377		156.786	112.68	112.011	105.18	254.39	143.993	104.823	75.3277	336.619		240.313	197.073	197.477	236.831	207.805	231.345	188.147	236.124	245.523		182.332	197.209	158.835	156.981	247.107	245.423	194.325	235.476	300.541
TPT	930.173	709.649	861.295	1037.25	813.799	1245.57	659.272	1022.55	1794.8		801.817	583.467	1091.9	922.821	1104.46	771.243	563.608	409.722	1396.35		729.818	791.75	855.036	875.396	849.031	946.727	640.723	925.444	841.556		1035.08	914.816	1099.45	1112.48	1118.36	1052.78	778.346	1779.69	2034.5
Dit1	89.5104	71.012	74.5526	184.35	155.103	193.098	232.459	228.146	234.781		71.7858	47.8667	185.334	138.24	162.199	113.399	209.714	54.7896	200.434		98.2796	96.7634	161.8	226.419	220.619	190.037	244.445	225.663	153.078		101.21	155.682	210.758	250.953	249.477	205.36	310.534	304.459	366.412
Dit2	35.115	28.8602	34.5838	88.8338	78.8212	121.321	110.918	88.3909	159.263		29.2174	16.3843	64.2272	51.5862	65.2328	66.8583	105.581	41.1401	120.682		39.9226	36.9086	74.6254	95.1625	98.1598	113.058	181.83	120.657	146.751		38.5571	45.0735	80.368	86.1801	81.7347	134.659	143.04	146.682	200.547
AMK2	47.9864	40.3121	50.5645	58.2253	110.988	287.332	47.9841	983.47	1366.57		30.8843	31.6435	49.2511	55.5635	154.896	188.894	35.2698	195.677	1085.24		40.2246	46.8105	49.2223	41.8574	116.525	267.338	48.7662	766.393	397.762		49.1232	145.931	53.5805	56.4092	155.199	336	61.6588	1525.77	1803.47
AMK1	68.5697	38.4208	83.4068	134.29	122.417	116.847	524.183	42.3377	125.451		57.1784	47.1498	77.9743	116.513	118.518	112.036	539.633	18.4912	128.343		62.4682	85.3406	96.8204	138.627	97.51	103.472	619.823	28.8276	117.969		75.2015	73.0636	111.88	162.179	181.468	135.356	1007.32	66.2211	139.031
PPA2	58.1007	66.1281	114.835	109.998	113.581	79.5836	99.76	306.673	184.819		66.3983	56.127	83.7992	110.855	97.0515	66.2178	61.8749	234.053	142.436		60.5436	44.4575	88.017	83.8955	111.469	63.3691	99.0704	203.859	174.495		54.7795	54.4072	62.4765	66.9804	79.9701	59.6752	90.9289	228.76	133.201
PPA6	279.557	236.506	248.961	266.021	237.254	384.885	800.707	599.315	767.745		187.01	174.987	323.43	246.32	279.802	205.795	639.225	185.309	503.712		257.241	315.742	227.841	239.685	329.468	423.575	714.276	528.067	326.665		316.926	360.225	322.23	301.98	282.455	382.189	795.338	1023.16	938.665
PEPC-K	5.91402	24.3802	51.3693	97.1522	89.0712	66.6657	89.597	250.277	214.802		12.0839	23.0893	56.3765	63.8868	58.4601	135.196	69.9116	432.483	294.969		11.2422	24.0107	135.793	153.112	74.1413	105.378	211.254	560.462	342.261		14.274	83.7069	45.2732	60.8024	87.0358	61.8203	85.1789	131.761	135.564
PPDK-RP	16.6725	69.5371	78.6227	59.5187	58.5716	59.8452	63.7899	275.436	200.003		23.0169	45.3104	51.0739	56.0978	67.5335	70.4676	52.9949	223.611	209.084		15.3088	43.7008	58.517	47.9392	45.3489	46.1788	59.6793	227.15	184.748		21.5921	68.224	46.9048	48.2263	66.7824	56.2194	67.0867	392.862	179.819
m-NAD-MDH	140.14	142.323	255.66	311.958	257.497	333.624	239.892	136.16	116.94		126.091	127.664	351.81	272.706	269.545	172.958	175.95	97.9443	86.9235		142.431	143.237	301.341	218.701	274.286	259.861	249.459	169.971	94.0421		149.993	156.557	318.471	264.815	240.38	209.824	235.881	131.831	129.527
AspAT1	62.9296	51.2912	129.32	233.156	296.695	356.857	158.178	78.21	93.0686		89.8515	39.6694	291.352	207.142	256.202	219.908	137.301	35.8276	89.5986		81.2965	49.6049	273.52	185.658	272.007	303.156	180.642	78.8017	95.0933		88.0094	70.632	330.194	295.531	245.825	321.833	298.528	40.6771	135.028
AspAT2	44.6202	55.9508	81.8112	94.1918	70.7237	122.174	160.122	43.1392	38.6953		38.916	45.9286	80.7292	75.2444	80.8158	68.6652	121.051	22.8527	20.887		53.3983	59.2045	136.91	108.958	95.6374	112.295	166.27	29.4854	22.5693		48.8175	51.7418	137.749	126.934	96.4362	98.1867	215.659	31.1213	34.7743
AspAT3	18.2573	25.1217	27.8684	19.3797	68.0796	190.812	52.1029	82.8714	34.2584		24.5292	17.5084	34.0318	23.5733	66.6536	250.253	23.4909	73.1428	25.499		18.5066	18.6207	42.169	18.2758	69.2469	138.513	31.9813	83.3892	38.9746		19.7334	26.5807	31.4294	20.3093	44.5185	313.113	49.4797	59.386	27.3622
AspAT4	42.3514	55.6357	80.5634	96.3811	71.3084	122.578	159.46	43.4243	39.2387		41.4723	45.1427	81.2048	75.6826	77.4504	69.146	121.027	22.9426	21.3417		52.6405	61.4077	135.138	109.861	95.979	109.719	166.663	28.8175	22.0826		49.0564	52.1768	137.837	126.028	95.7941	98.2304	219.058	32.2593	33.3704
NAD_ME1	53.4391	66.9233	54.4012	73.6985	9.66761	82.2226	78.0005	33.8725	46.1777		44.4126	58.3067	55.871	74.7599	29.6843	62.3535	57.9474	35.2257	38.5165		58.9811	78.6179	61.238	74.9036	29.3776	81.7586	75.6391	36.3347	60.0911		48.238	68.1489	53.195	89.4387	42.2346	56.2327	87.5147	32.7233	46.4435
NAD_ME2	11.9147	8.29415	6.63104	9.13122	10.3041	11.6517	10.3993	8.49934	5.70134		11.8588	4.92922	10.7356	6.59258	8.47193	7.40159	6.12019	5.54141	5.53819		13.9671	8.66823	9.41649	7.70088	9.37932	10.1707	7.57771	5.50027	4.07815		9.2601	8.65588	12.4024	10.4644	10.9008	9.23669	10.8907	7.48381	5.22156
NAD_ME3	87.6038	91.0082	56.0528	56.7409	72.5379	49.9934	52.6134	37.9476	42.3183		85.5109	35.0122	47.7787	49.0633	53.6359	46.8396	28.8571	41.6328	33.8561		99.2429	74.9192	58.0312	57.7363	71.6008	48.6243	45.9311	27.6674	34.5172		78.5947	60.6766	47.3289	56.2183	66.4055	37.095	46.414	36.1441	31.5715
cp-NAD-MDH	114.698	78.4585	88.2437	102.987	87.004	94.6001	75.0643	56.08	52.1794		88.0195	59.0004	77.4375	72.5919	87.9903	78.2535	45.6837	33.85	36.5128		94.154	69.4359	74.2432	77.271	87.442	80.3146	58.6332	57.3082	36.8428		98.1946	71.8087	63.0206	64.1014	69.1124	74.4496	57.8974	37.9906	36.3579
PEP-CK1	6.92955	18.1573	81.9996	5.17752	6.32342	7.3985	15.637	6.99297	14.3802		6.59186	9.32959	11.5882	10.8515	2.25575	5.71901	5.25831	21.7538	5.88		9.91075	15.983	5.44913	19.515	5.93544	4.12109	7.8927	9.12454	14.4869		5.05142	22.7528	19.3223	14.8572	2.83282	2.88532	16.5159	7.15461	7.41
PEP-CK2	6.12714	0.585187	2.32635	4.00025	0.234098	2.54391	0.49253	6.26023	4.76091		2.30574	0.84295	5.40001	4.59571	0.114903	2.02036	0.544828	7.77473	2.75414		3.6562	1.39105	4.4711	1.76112	0.296102	1.70553	0.525823	5.01875	3.39305		3.00863	1.53929	3.57184	5.33805	0.241965	2.11083	0.5467	5.70518	4.87816
normalized
	Fp1	Fro1	Fc1	Fpu1	Fa1	Fra1	Fbr1	Fb1	Ft1		Fp2	Fro2	Fc2	Fpu2	Fa2	Fra2	Fbr2	Fb2	Ft2		Fp3	Fro3	Fc3	Fpu3	Fa3	Fra3	Fbr3	Fb3	Ft3		Fp4	Fro4	Fc4	Fpu4	Fa4	Fra4	Fbr4	Fb4	Ft4
PEPC	1.69891	1.66114	2.8744	7.84289	12.0116	15.3369	17.4313	45.8165	100		1.60844	0.705882	1.80116	2.2018	8.00461	14.4488	12.2007	21.956	100		3.1478	2.30341	5.08241	11.1763	15.141	29.6152	26.0279	94.9506	100		1.43482	8.38837	1.88684	2.8939	9.3776	19.1037	26.7956	80.8913	100
PPDK	2.40217	2.10709	6.22294	18.1043	13.9256	19.5857	24.5723	62.7206	100		1.44662	1.0236	3.35976	8.10431	12.6771	13.3649	22.9234	28.6163	100		2.04416	2.6314	5.02665	17.5139	9.89988	13.0452	26.3579	63.8922	100		2.36456	7.56835	6.5507	13.3909	14.5315	19.0096	47.3374	100	97.2612
NADP-ME	2.15845	1.39152	20.657	40.9671	43.3202	57.7428	64.4131	90.7335	100		2.03578	1.43279	10.4141	21.6383	45.7058	71.9197	73.6855	62.1763	100		1.98411	1.54032	14.6558	38.259	33.4472	55.9907	100	65.447	84.3416		1.66951	9.39404	24.802	29.8867	48.5141	72.2976	100	89.6719	91.886
cp-NADP-MDH	7.51297	6.8686	13.8726	18.1489	25.1991	21.7161	35.1271	54.5884	100		7.48519	3.15352	10.3354	14.1615	33.3157	13.0327	43.2758	26.6634	100		14.1126	13.135	19.5678	31.0559	34.9898	29.4624	92.5346	92.9068	100		8.95684	12.8258	13.1857	13.9195	27.9166	20.2855	72.6658	99.1676	100
AlaAT	5.28517	5.63649	18.127	35.0274	60.045	74.7381	68.5959	88.4795	100		6.44814	5.74308	21.044	34.6316	50.2148	63.5925	69.2484	52.082	100		7.84639	9.72268	32.4666	44.5194	78.5914	70.3386	100	62.6492	67.1985		4.04355	9.48358	19.9509	33.8483	43.3291	48.6431	100	56.8805	80.4855
AspAT5	8.90965	5.8013	26.671	17.0694	21.9197	23.8112	50.3456	60.369	100		13.2716	7.41405	35.1106	25.8102	29.7478	27.718	60.1539	25.7108	100		17.9938	10.3277	57.4011	29.2349	31.9166	34.6518	100	88.7363	83.42		8.23554	11.3321	26.8065	18.5129	23.296	19.0779	56.6303	85.1189	100
BASS2	4.92988	4.39323	8.49415	16.2467	19.3266	31.5974	36.3522	76.9985	100		7.46602	3.7099	13.1427	22.4387	29.1011	28.2556	36.3588	40.7384	100		9.06331	5.86426	25.4452	24.3335	29.6015	55.4678	44.4455	100	92.2845		4.25114	11.9039	7.78028	16.5542	17.5572	22.9529	44.887	83.2638	100
NHD	3.07585	3.83183	3.07862	7.84334	7.33373	12.6829	26.5457	58.2528	100		4.13985	2.52193	3.96435	7.97745	9.02679	14.0319	25.9646	39.7426	100		4.29677	4.23212	5.71202	9.30138	10.2279	14.4997	57.263	66.8231	100		3.62796	9.61023	3.9039	7.43261	11.1769	16.4159	50.3467	100	95.36
CUE1	17.9663	19.4148	15.973	24.8525	22.9971	25.9792	16.8996	96.4747	100		10.9208	14.1382	13.7031	15.4663	27.7024	17.3927	19.4041	50.5177	100		18.0597	17.7064	21.8402	43.748	27.0282	25.5278	26.3503	100	80.4407		9.57695	17.3263	13.8765	19.4193	31.0424	20.3238	38.3934	71.4444	100
PPT2	52.8551	47.0855	30.7195	60.7715	60.4795	64.5273	26.752	57.9373	100		46.5765	33.4741	33.2753	31.246	75.5721	42.7762	31.14	22.3777	100		97.878	80.2667	80.4312	96.4599	84.6377	94.2254	76.6312	96.1718	100		60.668	65.618	52.8497	52.2328	82.2208	81.6604	64.6583	78.3506	100
TPT	51.8261	39.5392	47.9884	57.7923	45.3421	69.399	36.7324	56.9728	100		57.4222	41.7851	78.1964	66.0879	79.0961	55.2326	40.3628	29.3423	100		77.0886	83.6302	90.3149	92.4655	89.6806	100	67.6777	97.7519	88.891		50.8765	44.9652	54.0402	54.6806	54.9698	51.7463	38.2574	87.4756	100
Dit1	38.1251	30.2461	31.7541	78.5202	66.0631	82.2459	99.011	97.1742	100		34.2304	22.8248	88.3748	65.9182	77.3429	54.0732	100	26.1259	95.5749		40.2052	39.5849	66.1907	92.6257	90.253	77.7423	100	92.3164	62.6226		27.622	42.4882	57.5194	68.4894	68.0866	56.0463	84.75	83.0921	100
Dit2	22.0485	18.1211	21.7149	55.7781	49.4913	76.1767	69.6449	55.5001	100		24.2103	13.5764	53.2203	42.7456	54.0536	55.4005	87.4868	34.0897	100		21.956	20.2984	41.0414	52.3361	53.9844	62.178	100	66.3571	80.7079		19.226	22.4753	40.0745	42.9726	40.7559	67.1458	71.3252	73.1411	100
AMK2	3.51146	2.94988	3.70011	4.2607	8.12163	21.0259	3.51129	71.9665	100		2.84585	2.9158	4.53827	5.11992	14.273	17.4057	3.24995	18.0308	100		5.24856	6.1079	6.42259	5.46161	15.2044	34.8827	6.36309	100	51.9006		2.72382	8.09171	2.97097	3.12782	8.60556	18.6308	3.4189	84.6018	100
AMK1	13.0813	7.32965	15.9118	25.619	23.354	22.2913	100	8.07691	23.9326		10.5958	8.73737	14.4495	21.5912	21.9627	20.7615	100	3.42663	23.7834		10.0784	13.7686	15.6207	22.3656	15.7319	16.6938	100	4.65094	19.0327		7.46549	7.25326	11.1067	16.1001	18.0149	13.4372	100	6.57398	13.802
PPA2	18.9455	21.5631	37.4455	35.8681	37.0366	25.9507	32.5298	100	60.2658		28.3689	23.9805	35.8036	47.3633	41.4656	28.2918	26.4363	100	60.8565		29.6988	21.808	43.1755	41.1537	54.6793	31.0848	48.5976	100	85.5961		23.9462	23.7835	27.3109	29.2797	34.9581	26.0863	39.7486	100	58.2272
PPA6	34.9138	29.5372	31.0926	33.2232	29.6305	48.0681	100	74.8481	95.8834		29.2558	27.3748	50.5971	38.5341	43.772	32.1944	100	28.9896	78.8004		36.0143	44.2046	31.8982	33.5564	46.1262	59.3014	100	73.9305	45.7337		33.7635	38.3763	34.3285	32.1712	30.0912	40.7163	84.7307	109.002	100
PEPC-K	2.36299	9.7413	20.525	38.8179	35.5891	26.6368	35.7992	100	85.826		2.79408	5.33878	13.0355	14.7721	13.5173	31.2604	16.1652	100	68.2036		2.00588	4.28409	24.2288	27.3189	13.2286	18.8019	37.6928	100	61.0677		10.5293	61.7469	33.396	44.8513	64.2025	45.6021	62.8327	97.1942	100
PPDK-RP	6.05313	25.2462	28.5448	21.6089	21.2651	21.7274	23.1596	100	72.6132		10.2933	20.263	22.8405	25.0872	30.2013	31.5134	23.6996	100	93.5032		6.73954	19.2388	25.7614	21.1047	19.9643	20.3297	26.2731	100	81.3331		5.4961	17.3659	11.9392	12.2756	16.9989	14.3102	17.0764	100	45.7714
m-NAD-MDH	42.0056	42.6598	76.6314	93.5061	77.1818	100	71.905	40.8124	35.0516		35.8408	36.2877	100	77.5153	76.6166	49.1625	50.0129	27.8401	24.7075		47.2655	47.5332	100	72.5759	91.0216	86.2349	82.7828	56.4047	31.2078		47.0977	49.1591	100	83.152	75.4795	65.8848	74.0668	41.3952	40.6715
AspAT1	17.6344	14.373	36.2387	65.3359	83.141	100	44.3253	21.9163	26.0801		30.8395	13.6156	100	71.0968	87.9354	75.4784	47.1255	12.297	30.7527		26.8168	16.3628	90.2242	61.2418	89.7253	100	59.5872	25.9938	31.3678		26.6539	21.3911	100	89.5023	74.4488	97.4679	90.4098	12.3191	40.8937
AspAT2	27.8663	34.9425	51.0929	58.8248	44.1685	76.3006	100	26.9414	24.1661		32.1485	37.9417	66.6904	62.1595	66.762	56.7244	100	18.8787	17.2547		32.1154	35.6074	82.3422	65.5306	57.5193	67.538	100	17.7334	13.5739		22.6365	23.9925	63.8738	58.8587	44.7171	45.5288	100	14.4308	16.1247
AspAT3	9.56822	13.1657	14.6052	10.1565	35.679	100	27.3059	43.431	17.954		9.80174	6.99626	13.5989	9.41978	26.6344	100	9.38686	29.2275	10.1893		13.3609	13.4433	30.444	13.1943	49.9931	100	23.089	60.2031	28.1378		6.30232	8.48918	10.0377	6.48625	14.218	100	15.8025	18.9663	8.73876
AspAT4	26.5592	34.8901	50.5226	60.4421	44.7186	76.8705	100	27.2321	24.6072		34.267	37.2996	67.0964	62.5336	63.9943	57.1326	100	18.9566	17.6338		31.585	36.8454	81.0849	65.9182	57.5887	65.833	100	17.2909	13.2499		22.3943	23.8188	62.9228	57.5319	43.7301	44.8423	100	14.7264	15.2336
NAD_ME1	64.9931	81.3927	66.1633	89.6329	11.7579	100	94.865	41.1961	56.1618		59.407	77.992	74.734	100	39.7062	83.4051	77.5114	47.1185	51.5203		72.1405	96.1586	74.901	91.6156	35.9321	100	92.5152	44.4415	73.4982		55.1198	77.8713	60.7841	102.198	48.26	64.2551	100	37.3918	53.0694
NAD_ME2	100	69.6125	55.654	76.638	86.4815	97.7926	87.2807	71.3347	47.8512		100	41.566	90.5287	55.5924	71.4401	62.4145	51.6089	46.7284	46.7012		100	62.0619	67.4192	55.136	67.1531	72.8192	54.2541	39.3803	29.1984		74.6638	69.792	100	84.3744	87.8923	74.475	87.8109	60.3416	42.1012
NAD_ME3	96.2593	100	61.591	62.3471	79.7048	54.9329	57.8117	41.6969	46.4995		100	40.9448	55.8745	57.3766	62.724	54.7762	33.7467	48.6872	39.5928		100	75.4907	58.4739	58.1768	72.147	48.9953	46.2815	27.8784	34.7805		100	77.2019	60.219	71.5293	84.491	47.1978	59.0549	45.988	40.1699
cp-NAD-MDH	100	68.4046	76.9359	89.7903	75.855	82.4777	65.4453	48.8937	45.4929		100	67.0311	87.9777	82.4725	99.9668	88.9048	51.9018	38.4574	41.4826		100	73.7472	78.8529	82.0688	92.8713	85.3014	62.2738	60.8665	39.1304		100	73.1289	64.1793	65.28	70.3831	75.8184	58.9619	38.6891	37.0264
PEP-CK1	8.45071	22.1431	100	6.31407	7.71153	9.0226	19.0696	8.52805	17.5369		30.302	42.8871	53.2697	49.8831	10.3694	26.2897	24.1719	100	27.0297		62.0082	100	34.0934	122.099	37.136	25.7843	49.3819	57.0891	90.6398		22.2013	100	84.9227	65.2984	12.4504	12.6812	72.5885	31.445	32.5674
PEP-CK2	97.8741	9.34769	37.1608	63.8994	3.73945	40.6361	7.8676	100	76.0501		29.6569	10.8422	69.4559	59.1109	1.4779	25.9863	7.00768	100	35.4243		72.8507	27.717	89.088	35.0908	5.89991	33.9832	10.4772	100	67.6074		52.7352	26.9805	62.607	93.5651	4.24115	36.9986	9.58252	100	85.5042
