# Supplementary material for: The role of photorespiration during the evolution of C4 photosynthesis in the genus Flaveria
Source: eLife. 2014 Jun 16;3:e02478. doi: 10.7554/eLife.02478 (PMC4103682; doi:10.7554/eLife.02478)
Supplement: Figure 6—source data 2. — DOI: http://dx.doi.org/10.7554/eLife.02478.018 [file elife02478s008.xlsx]

## Sheet: Blatt1
	Fp1	Fro1	Fc1	Fpu1	Fa1	Fra1	Fbr1	Fb1	Ft1			Fp2	Fro2	Fc2	Fpu2	Fa2	Fra2	Fbr2	Fb2	Ft2			Fp3	Fro3	Fc3	Fpu3	Fa3	Fra3	Fbr3	Fb3	Ft3			Fp4	Fro4	Fc4	Fpu4	Fa4	Fra4	Fbr4	Fb4	Ft4
PEPC	6.1	6.3	6.2	6.2	8	17.2	28.4	59.3	100		PEPC	5.3	6.1	5.6	6.4	9.3	8.7	9.4	60	100		PEPC	6.3	6.2	7.2	13.2	8.6	12.3	13.6	50.9	100		PEPC	5.6	6.4	7.3	7.6	10.9	16.8	20	85.7	100
PPDK	12.2	12.6	14.8	16.5	19.9	37.7	60.7	73.6	100		PPDK	12.7	14.1	23.2	34.7	44	68.6	82.6	100	81.3		PPDK	11.6	11.4	24.9	41.1	28	33.5	76	100	78.8		PPDK	7.8	7.5	11.6	10	23.5	32.7	51.1	79.5	100
NADP-ME	11.9	14.5	12.9	18.3	37.9	67.3	88	97.9	100		NADP-ME	8.9	10.5	14.1	17.1	26.5	49.2	55.3	94.1	100		NADP-ME	27.4	28.8	30.7	36.4	41.6	54.5	55.9	100	95.3		NADP-ME	30.2	29.3	31.7	32.6	35.6	41.1	71.3	100	78.5
