# Supplementary figures and images for: The role of photorespiration during the evolution of C4 photosynthesis in the genus Flaveria
Source: eLife journal article supplement (doi:10.7554/elife.02478), 2014-06-16

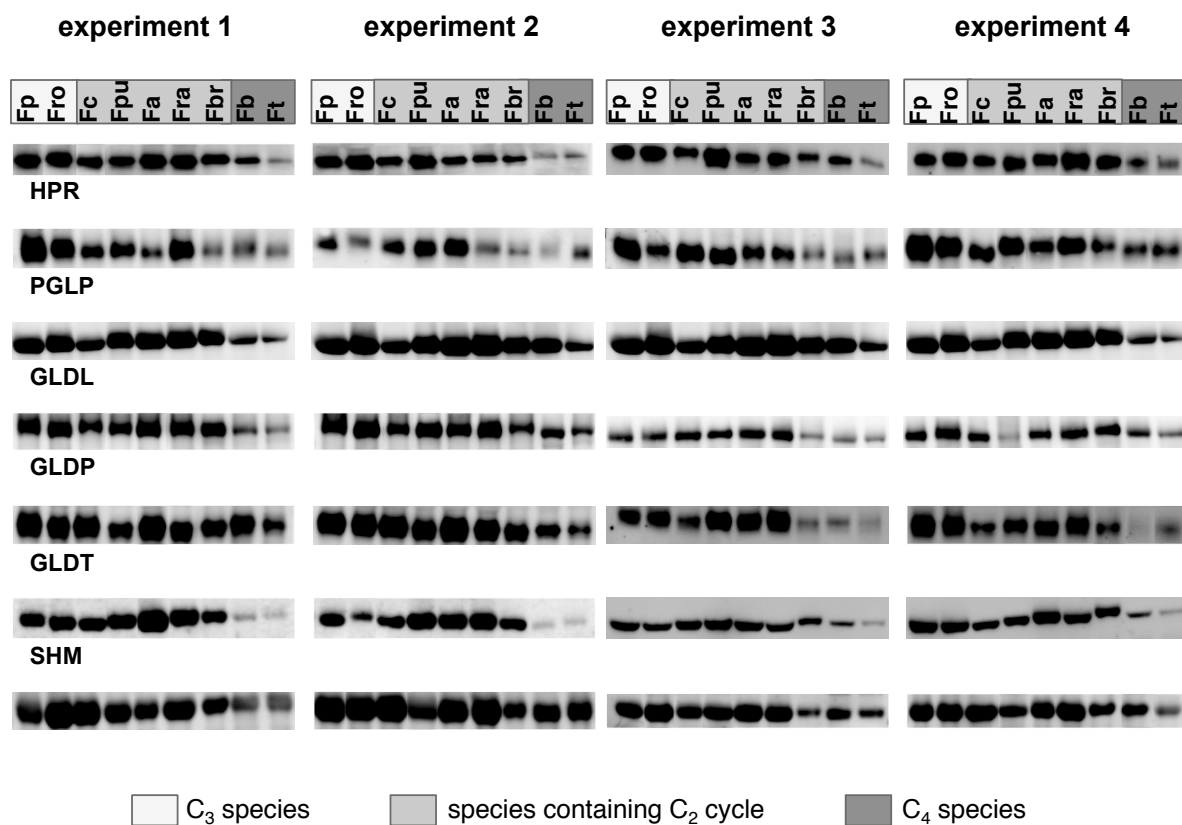

Figure 3 - Figure Supplement 2.

Supplement: supp [file elife-02478-supp-v1.zip]

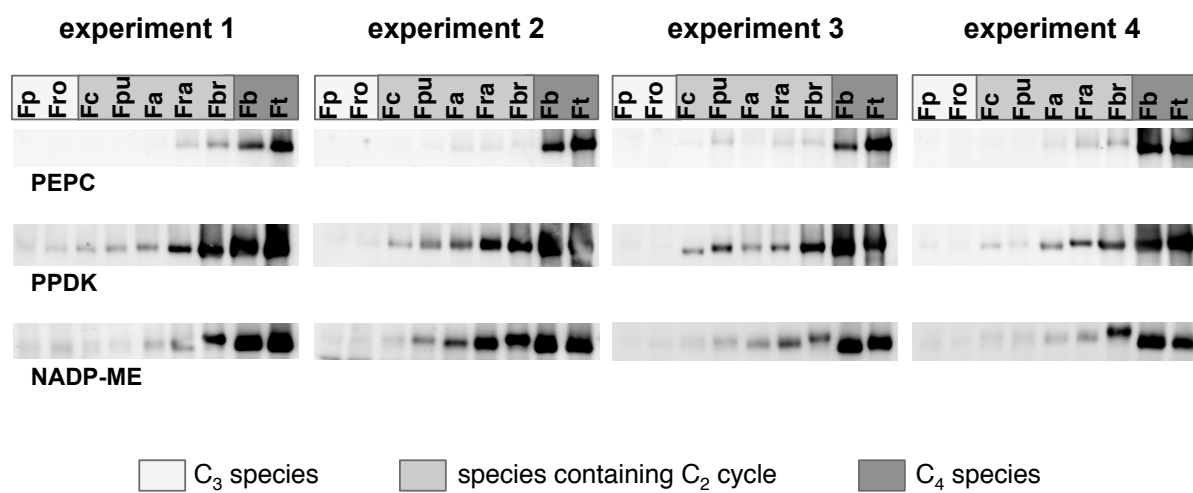

**Figure 6 - Figure Supplement 1.**

Supplement: supp [file elife-02478-supp-v1.zip]

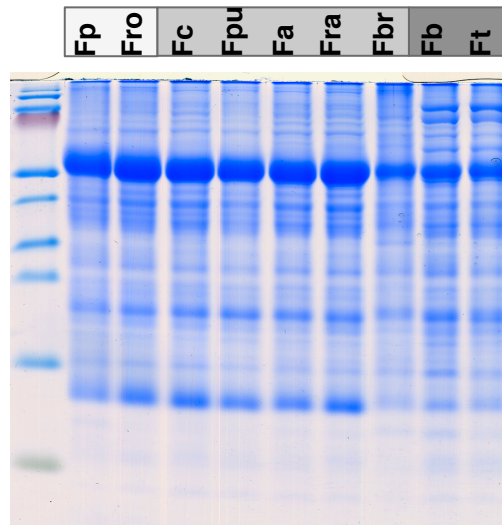

□  $C_3$  species

■ species containing  $C_2$  cycle

■  $C_4$  species

**Figure 3 - Figure Supplement 1.**

Supplement: supp [file elife-02478-supp-v1.zip]
